# Supplementary material for: Synergistic AML Cell Death Induction by Marine Cytotoxin (+)-1(R), 6(S), 1’(R), 6’(S), 11(R), 17(S)-Fistularin-3 and Bcl-2 Inhibitor Venetoclax
Source: MDPI journal article supplement (doi:10.3390/md16120518), 2018-12-19
Supplement: s1 [file s1]

## SUPPLEMENTARY MATERIAL

### Synergistic AML cell death induction by marine cytotoxin (+)-1(*R*), 6(*S*), 1'(*R*), 6'(*S*), 11(*R*), 17(*S*)-fistularin-3 and Bcl-2 inhibitor Venetoclax

Cristina Florean et al.

Supplementary Figure 1

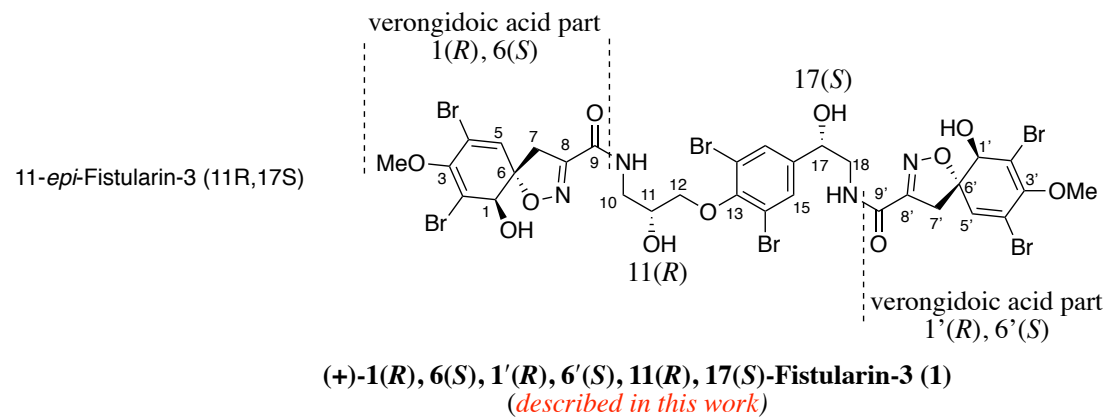

(A)  $^1\text{H}$  NMR spectrum of (+)-11R, 17S-fistularin-3 in Acetone- $\text{d}_6$ , 500MHz, 298K.

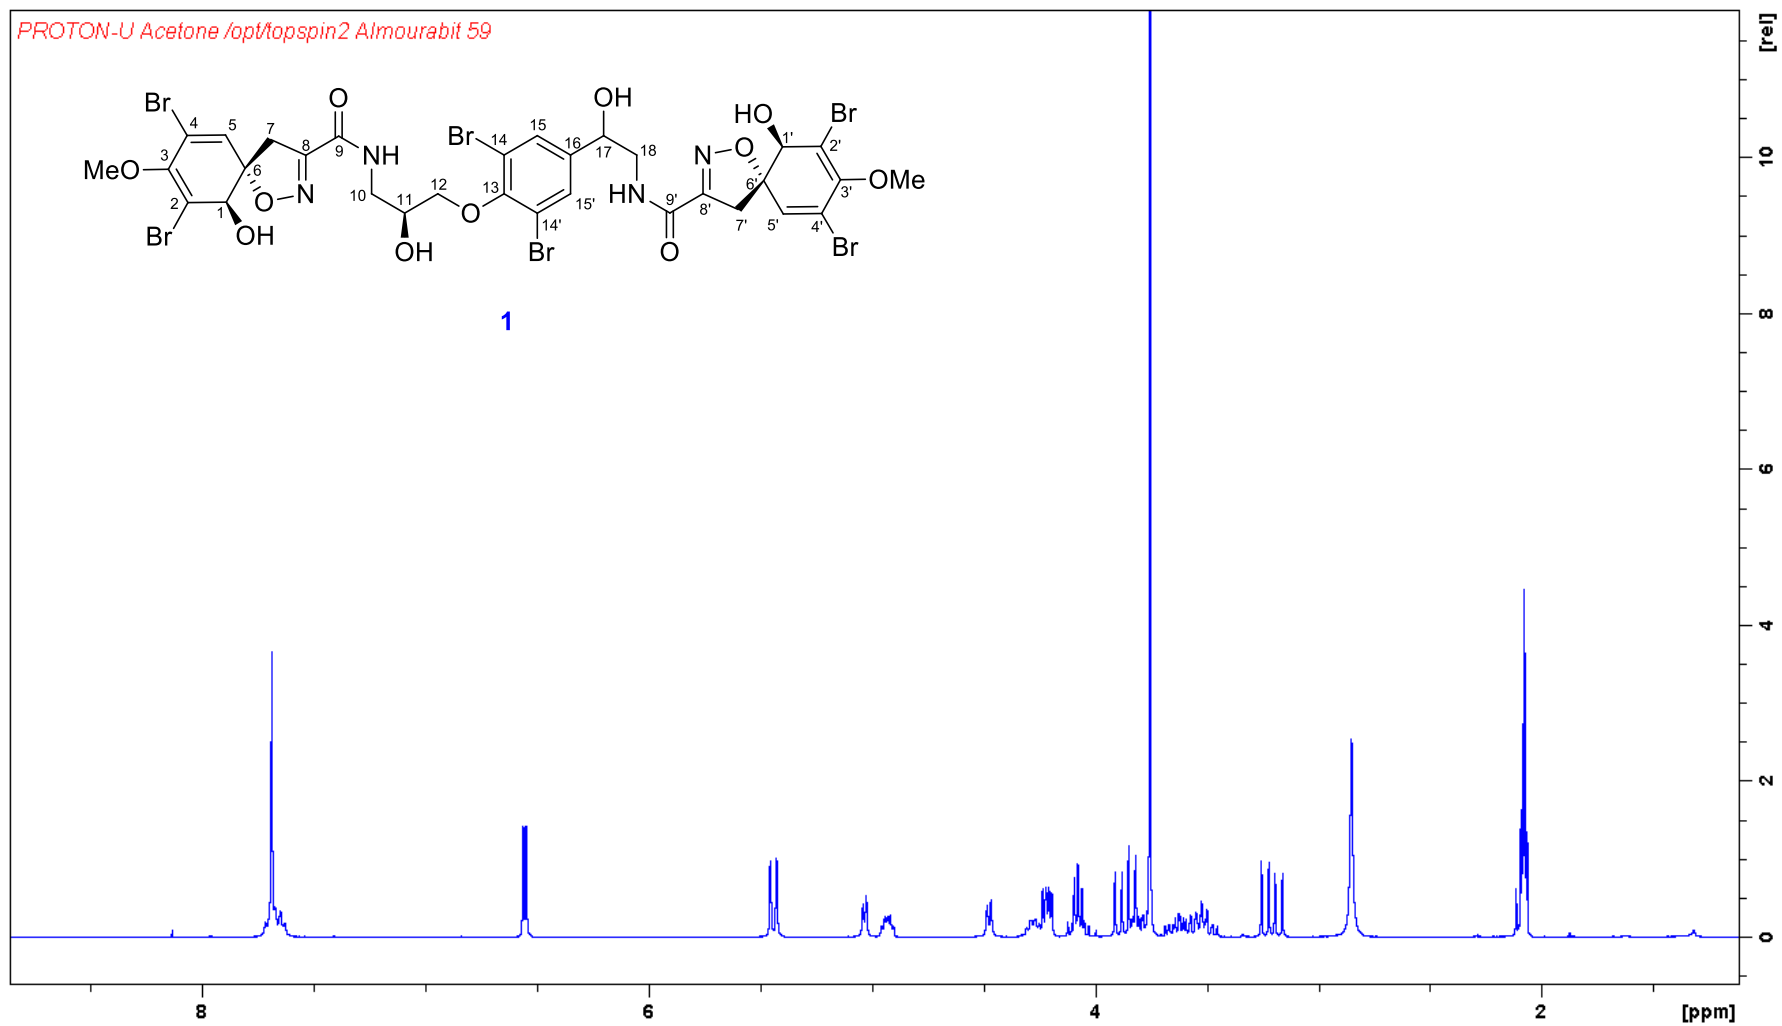

(B)  $^{13}\text{C}$  NMR spectrum of Fistularin -3 in Acetone- $d_6$ , 125MHz, 298K.

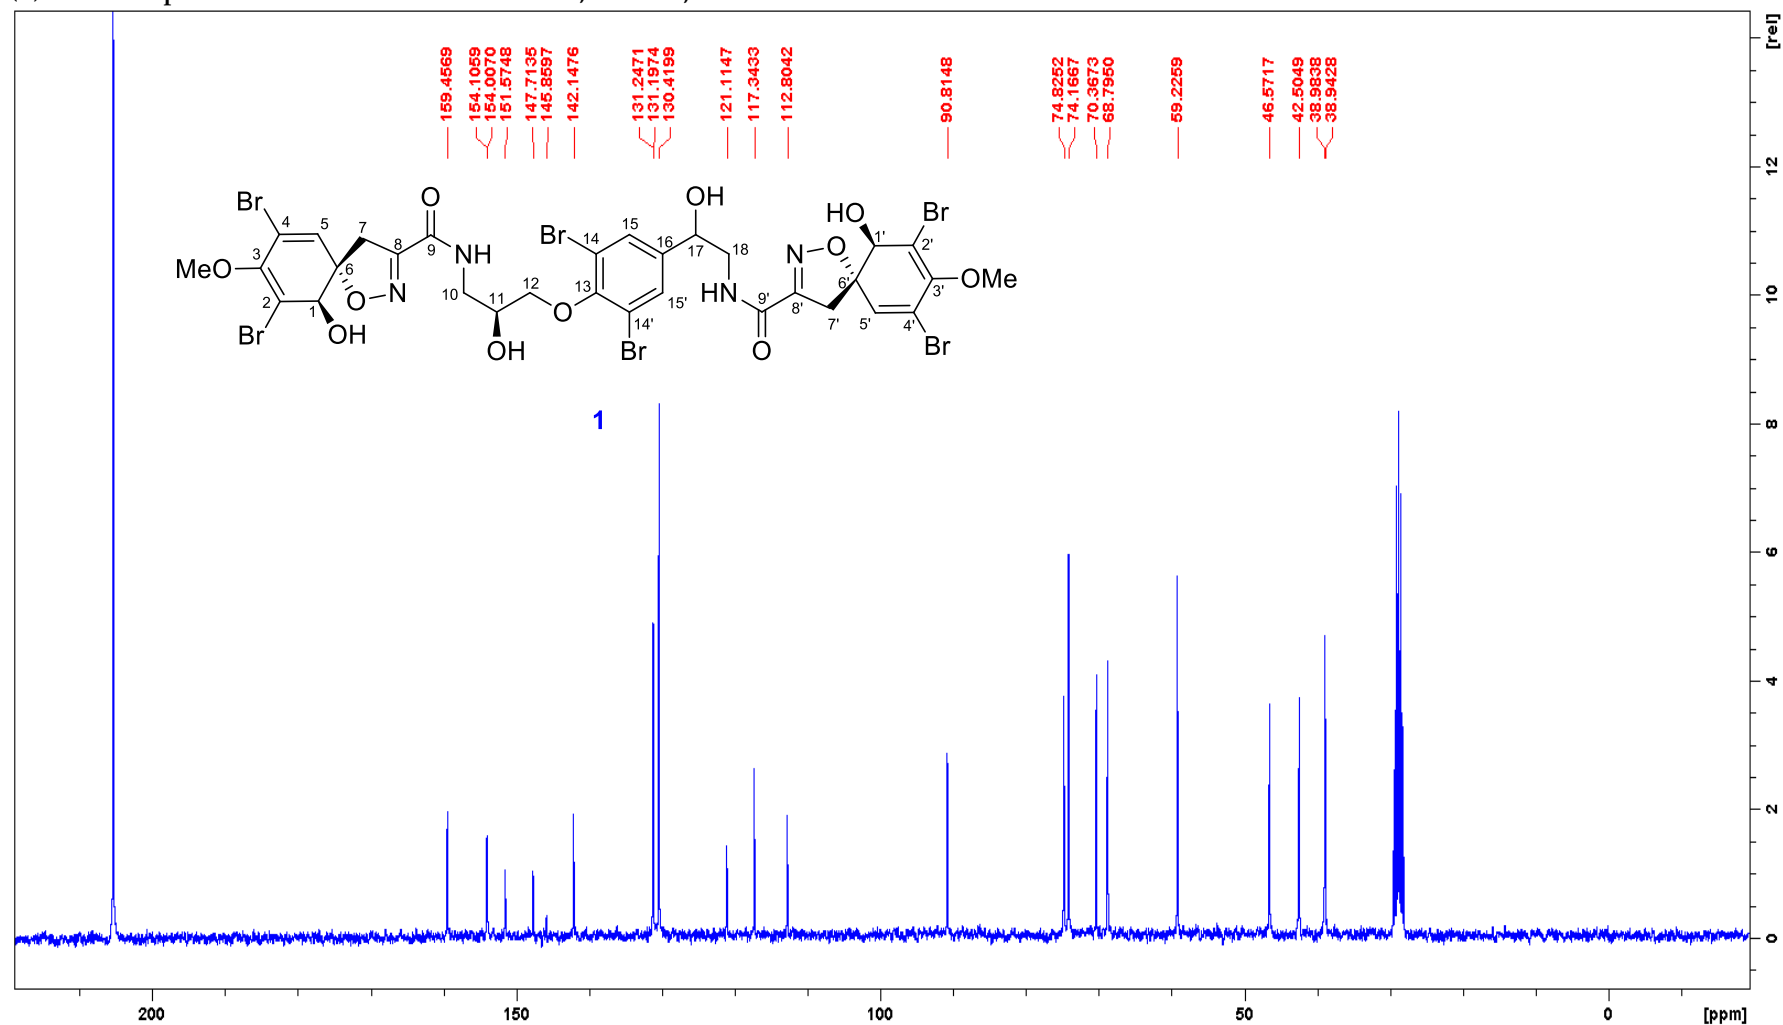

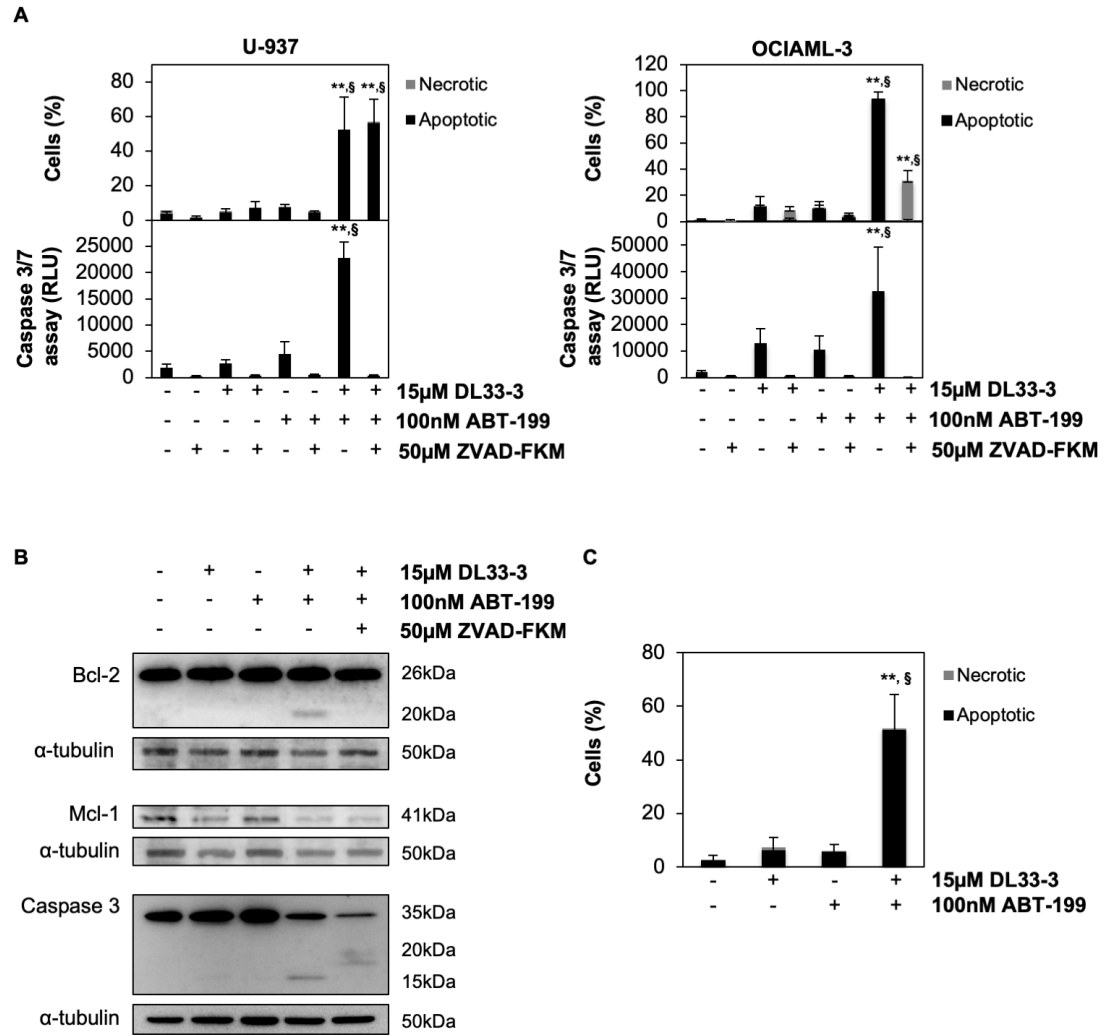

**Supplementary Figure 2. Effect of combination treatments of RS-F3 and ABT-199 in AML cell lines in presence of zVAD-FMK and concomitant treatments.** (A) Nuclear morphology analyses (upper panel) and caspase 3/7 activity assay (lower panel) in U-937 and OCIAML-3 cells treated with RS-F3 (24h) and then ABT-199 (16h) in presence or absence of 50μM zVAD-FMK. (B) Western blotting analyses in U-937 cells treated as described above. Blots are representative of three independent experiments. (C) Nuclear morphology analysis of U-937 cells treated concomitantly with RS-F3 and ABT-199 for 18h. All histograms represent the mean  $\pm$  SD of three independent experiments. Asterisks indicate statistical difference respect to control. The symbol § indicates statistical difference of combination treatments respect to both compounds taken alone. \*  $p \leq 0.05$ , \*\*  $p \leq 0.01$ ; §  $p \leq 0.01$ . RLU: relative luminescence units.

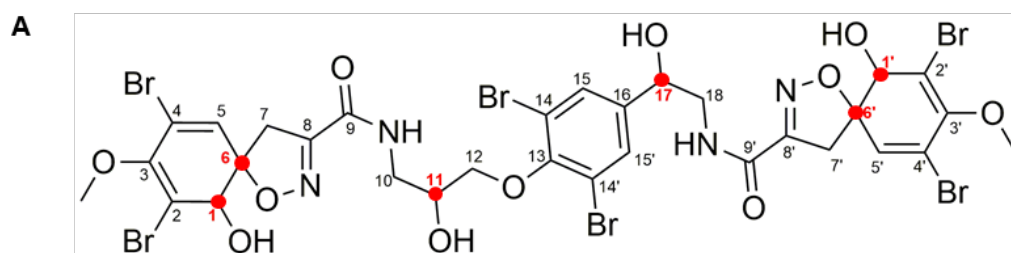

**B**

| Stereo-isomers  | Global Energy | Stereo-isomers  | Global Energy | Stereo-isomers  | Global Energy | Stereo-isomers  | Global Energy |
|-----------------|---------------|-----------------|---------------|-----------------|---------------|-----------------|---------------|
| RS <b>RS</b> SR | -48.22        | SR <b>RS</b> RR | -38.89        | RRSSRS          | -35.91        | SSSRRR          | -32.87        |
| SS <b>RS</b> RR | -45.15        | RRRRSS          | -38.69        | SRRRRR          | -35.90        | RSSRRR          | -32.38        |
| RRSSRR          | -44.86        | RRSRSR          | -38.65        | RR <b>RS</b> RS | -35.50        | RSRRRS          | -32.31        |
| SRSSRR          | -44.84        | SRRRSR          | -38.41        | SSSSSS          | -35.28        | SSSRRS          | -31.89        |
| RS <b>RS</b> RS | -44.34        | RS <b>RS</b> RR | -38.38        | SR <b>RS</b> RS | -35.18        | RSSSSS          | -31.42        |
| RS <b>RS</b> SS | -42.91        | SRSSSS          | -37.94        | RSSRSR          | -35.14        | SRSSSR          | -31.29        |
| SS <b>RS</b> RS | -42.41        | SSSSRS          | -37.80        | SR <b>RS</b> SS | -35.06        | RSSRRS          | -30.81        |
| SSSRSR          | -42.33        | RRRRSR          | -37.78        | RSSRSS          | -35.04        | RR <b>RS</b> SR | -30.72        |
| RRSRRS          | -41.07        | SRSRRR          | -37.45        | SSRRRR          | -35.00        | SSRRSS          | -29.84        |
| RR <b>RS</b> RR | -41.05        | SRSRRS          | -37.45        | RSRRRR          | -34.70        | SSRRSR          | -29.18        |
| SRSSRS          | -40.74        | SRRRRS          | -37.02        | RSRRSS          | -34.66        | SSSRSS          | -27.92        |
| SS <b>RS</b> SR | -39.88        | RRSSSS          | -36.91        | RRSSSR          | -34.36        | RRRRRS          | -27.61        |
| SS <b>RS</b> SS | -39.69        | SSSSSR          | -36.87        | SRRRSS          | -34.34        | RSSSSR          | -27.58        |
| RRSRRR          | -39.38        | RSSSRs          | -36.58        | RRSRSS          | -34.02        | RRRRRR          | -27.09        |
| RSRRSR          | -39.18        | SSRRRS          | -36.42        | SSSSRR          | -33.39        | RSSSRR          | -25.67        |
| SRSRSR          | -38.92        | SR <b>RS</b> SR | -36.21        | RR <b>RS</b> SS | -32.96        | SRSRSS          | -25.04        |

**Supplementary Figure 3. (A) The configuration of fistularin-3.** Positions of six chiral centers of fistularin-3 were marked with red dots and carbon numbers are labeled. **(B) Global energy scores for all 64 stereoisomers of fistularin-3.** C11(R), C17(S) stereoisomers are emphasized as bold text in red. Four C11-C17 diastereoisomers with established C1(R), C6(S), C1'(R), C6'(S) configuration are shown in blue boxes.
